# Supplementary material
Source: MDPI journal article supplement (https://www.mdpi.com/2077-0472/13/5/928)
Supplement: s1 [file s1]

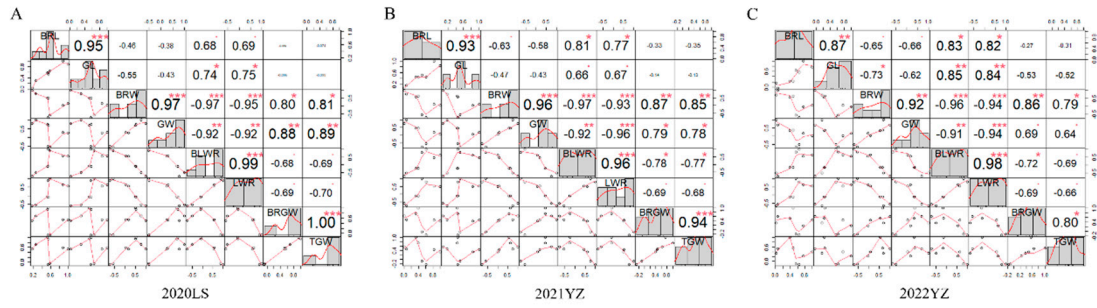

**Figure S1.** Trait correlations for brown rice traits and grain size traits in three environments. LS: Lingshui; YZ: Yangzhou; BRL: Brown rice length; BRW: Brown rice width; BLWR: Length-width ratio of brown rice; BRGW: Thousand grain weight of brown rice; GL: Grain length; GW: Grain width; LWR: Length-width ratio; TGW: Thousand grain weight; \*, \*\*, and \*\*\* showed the significant at the level of 5%, 1%, and 0.1%, respectively.

**Table S1.** Known grain size genes close to brown rice traits QTLs detected in this study.

| QTLs                          | Marker   | Chr. | Known gene          | Gene ID      | Reference |
|-------------------------------|----------|------|---------------------|--------------|-----------|
| <i>qBLWR3-1</i>               | SSR3-288 | 3    | <i>qLGY3/OsLG3b</i> | Os03g0215400 | [15,16]   |
| <i>qBRL5-1, qBRP5</i>         | SSR5-1   | 5    | <i>GS5</i>          | Os05g0158500 | [27]      |
| <i>qBTV6-4</i>                | SSR6-248 | 6    | <i>GW6a</i>         | Os06g0650300 | [29]      |
| <i>qBLWR7-2, qBRT7, qBTV7</i> | SSR7-174 | 7    | <i>GW7/GL7/SLG7</i> | Os07g0603300 | [32–34]   |
| <i>qBWC7-3</i>                | STS7-5   | 7    | <i>GLW7</i>         | Os07g0505200 | [35]      |
